# Supplementary material for: Can the reform of integrating health insurance reduce inequity in catastrophic health expenditure? Evidence from China
Source: Int J Equity Health. 2020 Apr 3;19:49. doi: 10.1186/s12939-020-1145-5 (PMC7126184; doi:10.1186/s12939-020-1145-5)
Supplement: Supplementary file 1 — Additional file 1. Description of the URRBMI and URBMI/NCMS household involved in the study. [file 12939_2020_1145_MOESM1_ESM.doc]

**Additional file 1: Description of the URRBMI and URBMI/NCMS household involved in the study**

Table S1: Description of the URRBMI and URBMI/NCMS involved in the study

| URRBMI | | | | URBMI/NCMS | | |
| --- | --- | --- | --- | --- | --- | --- |
| Province/ Municipality/ Autonomous Region (ID) | Sample areas | Sample areas ID | Year | Province/ Municipality/ Autonomous Region (ID) | Sample areas | Sample areas ID |
| Tianjin (12) | Hebei District | 120105 | 2010 | Beijing City (11) ‡ | Dongcheng District | 110101 |
| Binhai New Area | 120116 | Miyun Country | 110228 |
| Ji County | 120225 |  |  |
| Zhejiang (33) | Shangcheng District | 330102 | 2010 | Zhejiang (33) † | Haishu District | 330203 |
| Tonglu County | 330122 | 2010 | Huangyan District | 331003 |
| Tongxiang City | 330483 | 2003 |  |  |
| Shengzhou City | 330683 | 2013 |  |  |
| Jiangsu (32) | Xishan District | 320205 | 2011 | Jiangsu (32) † | Pizhou City | 320382 |
| Gusu District | 320508 | 2012 | Qishuyan District | 320405 |
| Yangzhong City | 321182 | 2010 | Jinhu County | 320831 |
| Fujian (35) | Jianyang City | 350784 | 2011 | Fujian (35) † | Yongtai County | 350125 |
|  |  |  | Ninghua County | 350424 |
|  |  |  | Yongding County | 350822 |
| Guangdong (44) | Shunde District | 440606 | 2004 | Guangdong (44) † | Liwan District | 440103 |
| Sihui City | 441284 | 2012 | Meijiang District | 441402 |
| Yangdong County | 441723 | 2011 |  |  |
| Yingde City | 441881 | 2011 |  |  |
| Hunan (43) | Tianxin District | 430103 | 2011 | Hunan (43) † | Zhengxiang District | 430408 |
|  |  |  | Yunxi District | 430603 |
|  |  |  | Anxiang County | 430721 |
|  |  |  | Cili County | 430821 |
|  |  |  | Anren County | 431028 |
|  |  |  | Hecheng District | 431202 |
|  |  |  | Yongshun County | 433127 |
| Hubei (42) | Echeng District | 420704 | 2009 | Hubei (42) † | Qingshan District | 420107 |
|  |  |  | Xisaishan District | 420203 |
|  |  |  | Zhuxi County | 420324 |
|  |  |  | Xiling District | 420502 |
|  |  |  | Laohekou City | 420682 |
|  |  |  | Macheng City | 421181 |
|  |  |  | Hefeng County | 422828 |
| Anhui (34) | Lujiang County | 340124 | 2013 | Anhui (34) † | Luyang District | 340103 |
| Fanchang County | 340222 | 2008 | Guzhen County | 340323 |
|  |  |  | Bagongshan District | 340405 |
|  |  |  | Daguan District | 340803 |
|  |  |  | Huangshan District | 341003 |
|  |  |  | Mengcheng County | 341622 |
| Chongqing (50) | Qianjiang District | 500114 | 2010 | Shaanxi (61) ‡ | Lintong District | 610115 |
| Zhong Country | 500233 | 2010 | Jintai District | 610303 |
| Wanzhou District | 500101 | 2010 | Mei County | 610326 |
| Yuzhong District | 500103 | 2010 | Weicheng | 610404 |
| shapingba district | 500106 | 2010 | Hanyin County | 610921 |
| Sichuan (51) | Qingyang District | 510105 | 2009 | Sichuan (51) † | Daan District | 510304 |
|  |  |  | Jiangyang District | 510502 |
|  |  |  | Yanting County | 510723 |
|  |  |  | Anju District | 510904 |
|  |  |  | Langzhong City | 511381 |
|  |  |  | Dongpo District | 511402 |
| Ningxia (64) | Xixia District | 640105 | 2012 | Hebei (13) ‡ | Lubei District | 130203 |
| Longde County | 640423 | 2011 | Wuan City | 130481 |
| Zhongning County | 640521 | 2012 | Tang County | 130627 |
|  |  |  | Fengning Manchu Autonomous County | 130826 |
| Inner Mongolia (15) | Jungar Banner | 150622 | 2012 | Inner Mongolia † (15) | Kalaqin Banner | 150428 |
|  |  |  | Kailu Country | 150523 |
| Xinjiang (65) | Baijiantan District | 650204 | 2009 | Xinjiang (65) † | Tianshan District | 650102 |
|  |  |  | Saybagh District | 650103 |
|  |  |  | Hotan County | 653221 |
|  |  |  | Xinyuan County | 654025 |

Note: URRBMI: urban-rural resident basic medical insurance; URBMI/NCMS : Urban Resident Basic Medical Insurance or New Rural Cooperative Medical Scheme ; Year: the time of implementation of the medical insurance integration system; † non-integration pilots of the province/ municipality/ autonomous region where the integrated areas are located; ‡ comparable regions by per capita GDP (as of 2012) are used for the analysis.
